# Supplementary material for: Decisive Factors in Sustainable Stormwater Management
Source: Research Square preprint supplement (doi:10.21203/rs.3.rs-6965519/v1), 2025-06-29
Supplement: Supplementary file 1 [file 04ca48326dc511eb3a2b10b2.xlsx]

## Sheet: Instruction
BWM (Best Worst Method)								Instruction:
In this excel file you will learn how to construct and solve a multi-criteria decision-making problem using BWM. There are two popular versions of BWM (non-linear BWM (Rezaei, 2015), and linear BWM (Rezaei, 2016)). This excel file is based on the linear BWM. The consistency check is based on Liang, Brunelli, Rezaei (2020). Here, there is an explanation of the five steps need to be taken in order …							Step 1.	Determine the number of decision criteria. This, of course, depends on your problem. For instance if you want to buy a car and you consider five criteria uality, price, comfort, safety, and style you should go to the Sheet C=5.
Requirement:
If you don't have Solver in the toolbar of your Excel, you need to install it first (follow the steps below): Go to "File", then "Options", then "Add-Ins". At the button (Excel Add-Ins, click on Go..."), Select "Solver Add-in" and press "OK". You should now be able to see Solver in your "Data" tab. You may also watch this video to know more about solving linear programming problem using Excel Sol…
								You should then enter the names of the criteria in the right place (see below, as example).
								Determine the best (e.g. the most desirable, the most important) and the worst (e.g. the least desirable, the least important) criteria based on the opinion of the decision-maker. You can choose the Best and the Worst from the drop-box next to "Select the best", and "Select the worst" respectively.
References:							Step 2.
Rezaei, J. (2015).Best-worst multi-criteria decision-making method. Omega, 53, 49-57.
Rezaei, J. (2016). Best-worst multi-criteria decision-making method: Some properties and a linear model. Omega, 64, 126-130.
Liang, F., Brunelli, M., Rezaei, J. (2020). Consistency issues in the Best Worst Method: Measurements and thresholds, Omega, 96, pp. 102175.
BWM Solver v2.0, Release date: 02-02-2022 Copyright ©Jafar Rezaei
To see more information visit www.bestworstmethod.com							Steps 3 & 4.	Express the preference of the decision-maker on "the Best criterion over all the other criteria", and the preference of "all the other criteria over the Worst" by selecting a number between 1 and 9 from the drop-box.
If you have any questions you may contact info@bestworstmethod.com										The meaning of the numbers 1-9:
										1: Equal importance
										2: Somewhat between Equal and Moderate
										3: Moderately more important than
										4: Somewhat between Moderate and Strong
										5: Strongly more important than
										6: Somewhat between Strong and Very strong
										7: Very strongly important than
										8: Somewhat between Very strong and Absolute
										9: Absulutly more important than
							Step 5.	Use Solver to solve the problem. Go to "Data" tab. Click on "Solver"
								A window like the one below opens. Press "Solve", and then "OK".
								After pressing the "OK" button, you get the weights and the input-based consistency ratio (CR) (reliability score) in the yellow cells.
							Note:	You just need to fill in the green boxes and leave the other boxes alone. After you operating the Solver, the weights of criteria will be automatically obtained.

## Sheet: Demonstration
	Antal faktorer = 9	Faktor 1	Faktor 2	Faktor 3	Faktor 4	Faktor 5	Faktor 6	Faktor 7	Faktor 8	Faktor 9
	Namn på faktorer	Ekonomiska resurser	Samhällsdynamik	Markanvändning	Externa samarbeten	Teknologisk innovation & anpassning	Multifunktionalitet	Policy, regler, lagstiftning	Organisatorisk kapacitet	Långsiktig integration
	Välj det mest avgörande
	Välj det minst avgörande	Ekonomiska resurser
	Rangordning från mest till mindre avgörande	Ekonomiska resurser	Samhällsdynamik	Markanvändning	Externa samarbeten	Teknologisk innovation & anpassning	Multifunktionalitet	Policy, regler, lagstiftning	Organisatorisk kapacitet	Långsiktig integration
	0	2	5	4	1	9	7	6	3	8										0.208333
	Rangordning från minst till mer avgörande	Ekonomiska resurser
	Ekonomiska resurser	8
	Samhällsdynamik	5
	Markanvändning	6
	Externa samarbeten	9
	Teknologisk innovation & anpassning	1
	Multifunktionalitet	2
	Policy, regler, lagstiftning	4
	Organisatorisk kapacitet	7
	Långsiktig integration	3
	Vikter	Ekonomiska resurser	Samhällsdynamik	Markanvändning	Externa samarbeten	Teknologisk innovation & anpassning	Multifunktionalitet	Policy, regler, lagstiftning	Organisatorisk kapacitet	Långsiktig integration
	Ksi*	0.0773837
	Inmatningsbaserad CR	0.208333	Nivån för konsistens i parvisa jämförelser är acceptabel
	Associerad tröskel	0.3662
	Sum of weights	0
	Constraint 1	0	0	0	0	0	0	0	0	0
		0	0	0	0	0	0	0	0	0
	Constraint 2	0	0	0	0	0	0	0	0	0
		0	0	0	0	0	0	0	0	0
				0.0972222	0.222222	0.208333	0	0	0.0694444	0.208333	0.166667
					Criteria	9
					Scales
					3	0.1667
					4	0.2683
					5	0.296
					6	0.3262
					7	0.3403
					8	0.3657
					9	0.3662
						9
						0.3662

## Sheet: 1
	Antal faktorer = 9	Faktor 1	Faktor 2	Faktor 3	Faktor 4	Faktor 5	Faktor 6	Faktor 7	Faktor 8	Faktor 9
	Namn på faktorer	Ekonomiska resurser	Samhällsdynamik	Markanvändning	Externa samarbeten	Teknologisk innovation & anpassning	Multifunktionalitet	Policy, regler, lagstiftning	Organisatorisk kapacitet	Långsiktig integration
	Välj det mest avgörande	Externa samarbeten
	Välj det minst avgörande	Teknologisk innovation & anpassning
	Rangordning från mest till mindre avgörande	Ekonomiska resurser	Samhällsdynamik	Markanvändning	Externa samarbeten	Teknologisk innovation & anpassning	Multifunktionalitet	Policy, regler, lagstiftning	Organisatorisk kapacitet	Långsiktig integration
	Externa samarbeten	6	5	2	1	9	8	4	3	7										0.166667
	Rangordning från minst till mer avgörande	Teknologisk innovation & anpassning
	Ekonomiska resurser	7
	Samhällsdynamik	4
	Markanvändning	9
	Externa samarbeten	9
	Teknologisk innovation & anpassning	1
	Multifunktionalitet	2
	Policy, regler, lagstiftning	5
	Organisatorisk kapacitet	6
	Långsiktig integration	3
	Vikter	Ekonomiska resurser	Samhällsdynamik	Markanvändning	Externa samarbeten	Teknologisk innovation & anpassning	Multifunktionalitet	Policy, regler, lagstiftning	Organisatorisk kapacitet	Långsiktig integration
		0.0657022	0.0788427	0.197107	0.299945	0.0228529	0.0492767	0.0985533	0.131404	0.0563162	1
	Ksi*	0.0942684
	Inmatningsbaserad CR	0.166667	Nivån för konsistens i parvisa jämförelser är acceptabel
	Associerad tröskel	0.3662
	Sum of weights	1
	Constraint 1	-0.0942684	-0.0942684	-0.0942684	0	0.0942684	-0.0942684	-0.0942684	-0.0942684	-0.0942684
		0.0942684	0.0942684	0.0942684	0	-0.0942684	0.0942684	0.0942684	0.0942684	0.0942684
	Constraint 2	-0.0942684	-0.0125691	-0.00856985	0.0942684	0	0.00357077	-0.0157114	-0.00571324	-0.0122426
		0.0942684	0.0125691	0.00856985	-0.0942684	0	-0.00357077	0.0157114	0.00571324	0.0122426
				0.458333	0.152778	0.125	0	0	0.0972222	0.152778	0.125
					Criteria	9
					Scales
					3	0.1667
					4	0.2683
					5	0.296
					6	0.3262
					7	0.3403
					8	0.3657
					9	0.3662
						9
						0.3662

## Sheet: 2
	Antal faktorer = 9	Faktor 1	Faktor 2	Faktor 3	Faktor 4	Faktor 5	Faktor 6	Faktor 7	Faktor 8	Faktor 9
	Namn på faktorer	Ekonomiska resurser	Samhällsdynamik	Markanvändning	Externa samarbeten	Teknologisk innovation & anpassning	Multifunktionalitet	Policy, regler, lagstiftning	Organisatorisk kapacitet	Långsiktig integration
	Välj det mest avgörande	Externa samarbeten
	Välj det minst avgörande	Teknologisk innovation & anpassning
	Rangordning från mest till mindre avgörande	Ekonomiska resurser	Samhällsdynamik	Markanvändning	Externa samarbeten	Teknologisk innovation & anpassning	Multifunktionalitet	Policy, regler, lagstiftning	Organisatorisk kapacitet	Långsiktig integration
	Externa samarbeten	8	6	5	1	9	7	4	3	2										0.0972222
	Rangordning från minst till mer avgörande	Teknologisk innovation & anpassning
	Ekonomiska resurser	2
	Samhällsdynamik	4
	Markanvändning	5
	Externa samarbeten	9
	Teknologisk innovation & anpassning	1
	Multifunktionalitet	3
	Policy, regler, lagstiftning	6
	Organisatorisk kapacitet	7
	Långsiktig integration	8
	Vikter	Ekonomiska resurser	Samhällsdynamik	Markanvändning	Externa samarbeten	Teknologisk innovation & anpassning	Multifunktionalitet	Policy, regler, lagstiftning	Organisatorisk kapacitet	Långsiktig integration
		0.0478796	0.0638395	0.0766074	0.314637	0.0273598	0.0547196	0.0957592	0.127679	0.191518
	Ksi*	0.0683995
	Inmatningsbaserad CR	0.0972222	Nivån för konsistens i parvisa jämförelser är acceptabel
	Associerad tröskel	0.3662
	Sum of weights	1
	Constraint 1	-0.0683995	-0.0683995	-0.0683995	0	0.0683995	-0.0683995	-0.0683995	-0.0683995	-0.0683995
		0.0683995	0.0683995	0.0683995	0	-0.0683995	0.0683995	0.0683995	0.0683995	0.0683995
	Constraint 2	-0.00683995	-0.0455996	-0.0601915	0.0683995	0	-0.0273598	-0.0683995	-0.0638395	-0.0273598
		0.00683995	0.0455996	0.0601915	-0.0683995	0	0.0273598	0.0683995	0.0638395	0.0273598
				0.0972222	0.208333	0.222222	0	0	0.166667	0.208333	0.166667
					Criteria	9
					Scales
					3	0.1667
					4	0.2683
					5	0.296
					6	0.3262
					7	0.3403
					8	0.3657
					9	0.3662
						9
						0.3662

## Sheet: 3
	Antal faktorer = 9	Faktor 1	Faktor 2	Faktor 3	Faktor 4	Faktor 5	Faktor 6	Faktor 7	Faktor 8	Faktor 9
	Namn på faktorer	Ekonomiska resurser	Samhällsdynamik	Markanvändning	Externa samarbeten	Teknologisk innovation & anpassning	Multifunktionalitet	Policy, regler, lagstiftning	Organisatorisk kapacitet	Långsiktig integration
	Välj det mest avgörande	Externa samarbeten
	Välj det minst avgörande	Teknologisk innovation & anpassning
	Rangordning från mest till mindre avgörande	Ekonomiska resurser	Samhällsdynamik	Markanvändning	Externa samarbeten	Teknologisk innovation & anpassning	Multifunktionalitet	Policy, regler, lagstiftning	Organisatorisk kapacitet	Långsiktig integration
	Externa samarbeten	4	7	5	1	9	6	2	3	8										0.208333
	Rangordning från minst till mer avgörande	Teknologisk innovation & anpassning
	Ekonomiska resurser	6
	Samhällsdynamik	2
	Markanvändning	5
	Externa samarbeten	9
	Teknologisk innovation & anpassning	1
	Multifunktionalitet	4
	Policy, regler, lagstiftning	8
	Organisatorisk kapacitet	7
	Långsiktig integration	3
	Vikter	Ekonomiska resurser	Samhällsdynamik	Markanvändning	Externa samarbeten	Teknologisk innovation & anpassning	Multifunktionalitet	Policy, regler, lagstiftning	Organisatorisk kapacitet	Långsiktig integration
		0.0957592	0.0547196	0.0766074	0.314637	0.0273598	0.0638395	0.191518	0.127679	0.0478796
	Ksi*	0.0683995
	Inmatningsbaserad CR	0.208333	Nivån för konsistens i parvisa jämförelser är acceptabel
	Associerad tröskel	0.3662
	Sum of weights	1
	Constraint 1	-0.0683995	-0.0683995	-0.0683995	0	0.0683995	-0.0683995	-0.0683995	-0.0683995	-0.0683995
		0.0683995	0.0683995	0.0683995	0	-0.0683995	0.0683995	0.0683995	0.0683995	0.0683995
	Constraint 2	-0.0683995	2.22045e-16	-0.0601915	0.0683995	0	-0.0455996	-0.0273598	-0.0638395	-0.0341997
		0.0683995	-2.22045e-16	0.0601915	-0.0683995	0	0.0455996	0.0273598	0.0638395	0.0341997
				0.208333	0.0694444	0.222222	0	0	0.208333	0.0972222	0.166667
					Criteria	9
					Scales
					3	0.1667
					4	0.2683
					5	0.296
					6	0.3262
					7	0.3403
					8	0.3657
					9	0.3662
						9
						0.3662

## Sheet: 4
	Antal faktorer = 9	Faktor 1	Faktor 2	Faktor 3	Faktor 4	Faktor 5	Faktor 6	Faktor 7	Faktor 8	Faktor 9
	Namn på faktorer	Ekonomiska resurser	Samhällsdynamik	Markanvändning	Externa samarbeten	Teknologisk innovation & anpassning	Multifunktionalitet	Policy, regler, lagstiftning	Organisatorisk kapacitet	Långsiktig integration
	Välj det mest avgörande	Externa samarbeten
	Välj det minst avgörande	Teknologisk innovation & anpassning
	Rangordning från mest till mindre avgörande	Ekonomiska resurser	Samhällsdynamik	Markanvändning	Externa samarbeten	Teknologisk innovation & anpassning	Multifunktionalitet	Policy, regler, lagstiftning	Organisatorisk kapacitet	Långsiktig integration
	Externa samarbeten	4	8	7	1	9	6	3	2	5										0.222222
	Rangordning från minst till mer avgörande	Teknologisk innovation & anpassning
	Ekonomiska resurser	6
	Samhällsdynamik	2
	Markanvändning	3
	Externa samarbeten	9
	Teknologisk innovation & anpassning	1
	Multifunktionalitet	4
	Policy, regler, lagstiftning	7
	Organisatorisk kapacitet	8
	Långsiktig integration	5
	Vikter	Ekonomiska resurser	Samhällsdynamik	Markanvändning	Externa samarbeten	Teknologisk innovation & anpassning	Multifunktionalitet	Policy, regler, lagstiftning	Organisatorisk kapacitet	Långsiktig integration
		0.0957592	0.0478796	0.0547196	0.314637	0.0273598	0.0638395	0.127679	0.191518	0.0766074
	Ksi*	0.0683995
	Inmatningsbaserad CR	0.222222	Nivån för konsistens i parvisa jämförelser är acceptabel
	Associerad tröskel	0.3662
	Sum of weights	1
	Constraint 1	-0.0683995	-0.0683995	-0.0683995	0	0.0683995	-0.0683995	-0.0683995	-0.0683995	-0.0683995
		0.0683995	0.0683995	0.0683995	0	-0.0683995	0.0683995	0.0683995	0.0683995	0.0683995
	Constraint 2	-0.0683995	-0.00683995	-0.0273598	0.0683995	0	-0.0455996	-0.0638395	-0.0273598	-0.0601915
		0.0683995	0.00683995	0.0273598	-0.0683995	0	0.0455996	0.0638395	0.0273598	0.0601915
				0.208333	0.0972222	0.166667	0	0	0.208333	0.166667	0.0972222
					Criteria	9
					Scales
					3	0.1667
					4	0.2683
					5	0.296
					6	0.3262
					7	0.3403
					8	0.3657
					9	0.3662
						9
						0.3662

## Sheet: 5
	Antal faktorer = 9	Faktor 1	Faktor 2	Faktor 3	Faktor 4	Faktor 5	Faktor 6	Faktor 7	Faktor 8	Faktor 9
	Namn på faktorer	Ekonomiska resurser	Samhällsdynamik	Markanvändning	Externa samarbeten	Teknologisk innovation & anpassning	Multifunktionalitet	Policy, regler, lagstiftning	Organisatorisk kapacitet	Långsiktig integration
	Välj det mest avgörande	Externa samarbeten
	Välj det minst avgörande	Teknologisk innovation & anpassning
	Rangordning från mest till mindre avgörande	Ekonomiska resurser	Samhällsdynamik	Markanvändning	Externa samarbeten	Teknologisk innovation & anpassning	Multifunktionalitet	Policy, regler, lagstiftning	Organisatorisk kapacitet	Långsiktig integration
	Externa samarbeten	6	5	2	1	9	7	4	3	8										0.0972222
	Rangordning från minst till mer avgörande	Teknologisk innovation & anpassning
	Ekonomiska resurser	5
	Samhällsdynamik	4
	Markanvändning	8
	Externa samarbeten	9
	Teknologisk innovation & anpassning	1
	Multifunktionalitet	3
	Policy, regler, lagstiftning	6
	Organisatorisk kapacitet	7
	Långsiktig integration	2
	Vikter	Ekonomiska resurser	Samhällsdynamik	Markanvändning	Externa samarbeten	Teknologisk innovation & anpassning	Multifunktionalitet	Policy, regler, lagstiftning	Organisatorisk kapacitet	Långsiktig integration
		0.0640085	0.0768102	0.192025	0.313305	0.0269509	0.0548644	0.0960127	0.128017	0.0480064
	Ksi*	0.0707462
	Inmatningsbaserad CR	0.0972222	Nivån för konsistens i parvisa jämförelser är acceptabel
	Associerad tröskel	0.3662
	Sum of weights	1
	Constraint 1	-0.0707462	-0.0707462	-0.0707462	0	0.0707462	-0.0707462	-0.0707462	-0.0707462	-0.0707462
		0.0707462	0.0707462	0.0707462	0	-0.0707462	0.0707462	0.0707462	0.0707462	0.0707462
	Constraint 2	-0.0707462	-0.0309936	-0.0235821	0.0707462	0	-0.0259884	-0.0656929	-0.0606396	-0.00589552
		0.0707462	0.0309936	0.0235821	-0.0707462	0	0.0259884	0.0656929	0.0606396	0.00589552
				0.291667	0.152778	0.0972222	0	0	0.166667	0.208333	0.166667
					Criteria	9
					Scales
					3	0.1667
					4	0.2683
					5	0.296
					6	0.3262
					7	0.3403
					8	0.3657
					9	0.3662
						9
						0.3662

## Sheet: 6
	Antal faktorer = 9	Faktor 1	Faktor 2	Faktor 3	Faktor 4	Faktor 5	Faktor 6	Faktor 7	Faktor 8	Faktor 9
	Namn på faktorer	Ekonomiska resurser	Samhällsdynamik	Markanvändning	Externa samarbeten	Teknologisk innovation & anpassning	Multifunktionalitet	Policy, regler, lagstiftning	Organisatorisk kapacitet	Långsiktig integration
	Välj det mest avgörande	Externa samarbeten
	Välj det minst avgörande	Teknologisk innovation & anpassning
	Rangordning från mest till mindre avgörande	Ekonomiska resurser	Samhällsdynamik	Markanvändning	Externa samarbeten	Teknologisk innovation & anpassning	Multifunktionalitet	Policy, regler, lagstiftning	Organisatorisk kapacitet	Långsiktig integration
	Externa samarbeten	6	8	3	1	9	4	5	2	7										0.166667
	Rangordning från minst till mer avgörande	Teknologisk innovation & anpassning
	Ekonomiska resurser	5
	Samhällsdynamik	2
	Markanvändning	7
	Externa samarbeten	9
	Teknologisk innovation & anpassning	1
	Multifunktionalitet	6
	Policy, regler, lagstiftning	4
	Organisatorisk kapacitet	8
	Långsiktig integration	3
	Vikter	Ekonomiska resurser	Samhällsdynamik	Markanvändning	Externa samarbeten	Teknologisk innovation & anpassning	Multifunktionalitet	Policy, regler, lagstiftning	Organisatorisk kapacitet	Långsiktig integration
		0.0640085	0.0480064	0.128017	0.313305	0.0269509	0.0960127	0.0768102	0.192025	0.0548644
	Ksi*	0.0707462
	Inmatningsbaserad CR	0.166667	Nivån för konsistens i parvisa jämförelser är acceptabel
	Associerad tröskel	0.3662
	Sum of weights	1
	Constraint 1	-0.0707462	-0.0707462	-0.0707462	0	0.0707462	-0.0707462	-0.0707462	-0.0707462	-0.0707462
		0.0707462	0.0707462	0.0707462	0	-0.0707462	0.0707462	0.0707462	0.0707462	0.0707462
	Constraint 2	-0.0707462	-0.00589552	-0.0606396	0.0707462	0	-0.0656929	-0.0309936	-0.0235821	-0.0259884
		0.0707462	0.00589552	0.0606396	-0.0707462	0	0.0656929	0.0309936	0.0235821	0.0259884
				0.291667	0.0972222	0.166667	0	0	0.208333	0.152778	0.0972222
					Criteria	9
					Scales
					3	0.1667
					4	0.2683
					5	0.296
					6	0.3262
					7	0.3403
					8	0.3657
					9	0.3662
						9
						0.3662

## Sheet: 7
	Antal faktorer = 9	Faktor 1	Faktor 2	Faktor 3	Faktor 4	Faktor 5	Faktor 6	Faktor 7	Faktor 8	Faktor 9
	Namn på faktorer	Ekonomiska resurser	Samhällsdynamik	Markanvändning	Externa samarbeten	Teknologisk innovation & anpassning	Multifunktionalitet	Policy, regler, lagstiftning	Organisatorisk kapacitet	Långsiktig integration
	Välj det mest avgörande		As this was a facilitated group exercise requiring step-by-step input, the participant was unable to complete the prioritization due to technical limitations. This particioant found it challenging to follow the process remotely via phone assistance and was therefore unable to submit scores. The corresponding cells have been left blank, however, this participant joined and contributed to the group…
	Välj det minst avgörande
	Rangordning från mest till mindre avgörande	Ekonomiska resurser	Samhällsdynamik	Markanvändning	Externa samarbeten	Teknologisk innovation & anpassning	Multifunktionalitet	Policy, regler, lagstiftning	Organisatorisk kapacitet	Långsiktig integration
	0																			#DIV/0!
	Rangordning från minst till mer avgörande	0
	Ekonomiska resurser
	Samhällsdynamik
	Markanvändning
	Externa samarbeten
	Teknologisk innovation & anpassning
	Multifunktionalitet
	Policy, regler, lagstiftning
	Organisatorisk kapacitet
	Långsiktig integration
	Vikter	Ekonomiska resurser	Samhällsdynamik	Markanvändning	Externa samarbeten	Teknologisk innovation & anpassning	Multifunktionalitet	Policy, regler, lagstiftning	Organisatorisk kapacitet	Långsiktig integration
	Ksi*	0.0801543
	Inmatningsbaserad CR		Nivån för konsistens i parvisa jämförelser är inte acceptabel
	Associerad tröskel
	Sum of weights	0
	Constraint 1	0	0	0	0	0	0	0	0	0
		0	0	0	0	0	0	0	0	0
	Constraint 2	0	0	0	0	0	0	0	0	0
		0	0	0	0	0	0	0	0	0
				#DIV/0!	#DIV/0!	#DIV/0!	#DIV/0!	#DIV/0!	#DIV/0!	#DIV/0!	#DIV/0!
					Criteria	9
					Scales
					3	0.1667
					4	0.2683
					5	0.296
					6	0.3262
					7	0.3403
					8	0.3657
					9	0.3662
						0
						#N/A

## Sheet: 8
	Antal faktorer = 9	Faktor 1	Faktor 2	Faktor 3	Faktor 4	Faktor 5	Faktor 6	Faktor 7	Faktor 8	Faktor 9
	Namn på faktorer	Ekonomiska resurser	Samhällsdynamik	Markanvändning	Externa samarbeten	Teknologisk innovation & anpassning	Multifunktionalitet	Policy, regler, lagstiftning	Organisatorisk kapacitet	Långsiktig integration
	Välj det mest avgörande	Externa samarbeten
	Välj det minst avgörande	Teknologisk innovation & anpassning
	Rangordning från mest till mindre avgörande	Ekonomiska resurser	Samhällsdynamik	Markanvändning	Externa samarbeten	Teknologisk innovation & anpassning	Multifunktionalitet	Policy, regler, lagstiftning	Organisatorisk kapacitet	Långsiktig integration
	Externa samarbeten	4	8	3	1	9	6	2	7	5										0.152778
	Rangordning från minst till mer avgörande	Teknologisk innovation & anpassning
	Ekonomiska resurser	6
	Samhällsdynamik	2
	Markanvändning	7
	Externa samarbeten	9
	Teknologisk innovation & anpassning	1
	Multifunktionalitet	5
	Policy, regler, lagstiftning	8
	Organisatorisk kapacitet	3
	Långsiktig integration	4
	Vikter	Ekonomiska resurser	Samhällsdynamik	Markanvändning	Externa samarbeten	Teknologisk innovation & anpassning	Multifunktionalitet	Policy, regler, lagstiftning	Organisatorisk kapacitet	Långsiktig integration
		0.0960127	0.0480064	0.128017	0.313305	0.0269509	0.0640085	0.192025	0.0548644	0.0768102
	Ksi*	0.0707462
	Inmatningsbaserad CR	0.152778	Nivån för konsistens i parvisa jämförelser är acceptabel
	Associerad tröskel	0.3662
	Sum of weights	1
	Constraint 1	-0.0707462	-0.0707462	-0.0707462	0	0.0707462	-0.0707462	-0.0707462	-0.0707462	-0.0707462
		0.0707462	0.0707462	0.0707462	0	-0.0707462	0.0707462	0.0707462	0.0707462	0.0707462
	Constraint 2	-0.0656929	-0.00589552	-0.0606396	0.0707462	0	-0.0707462	-0.0235821	-0.0259884	-0.0309936
		0.0656929	0.00589552	0.0606396	-0.0707462	0	0.0707462	0.0235821	0.0259884	0.0309936
				0.208333	0.0972222	0.166667	0	0	0.291667	0.0972222	0.166667
					Criteria	9
					Scales
					3	0.1667
					4	0.2683
					5	0.296
					6	0.3262
					7	0.3403
					8	0.3657
					9	0.3662
						9
						0.3662

[truncated: 4 more sheets: 9, 10, Results, backup sheet]
