# Supplementary material for: Decisive Factors in Sustainable Stormwater Management
Source: Research Square preprint supplement (doi:10.21203/rs.3.rs-6965519/v1), 2025-06-29
Supplement: Supplementary file 2 [file 5c65a98c5f1536b50a88441f.xlsx]

## Sheet: Sheet1
Supplementary Note 1. | Multi-Level Perspective (MLP) Analysis of decisive Factors Influencing past and present Stormwater Management. This table categorizes and details the decisive factors identified through a MLP analysis, which explores the dynamics of stormwater management transition in Swedish cities from the 1960s to 2024. The table is structured into three main sections corresponding to d…
MLP	DESIGNED QUESTION	IDENTIFIED FACTOR	DESCRIPTION
Landscape	The questions were designed to identify the macro pressures of urbanization, sustainability, climate change, major flooding/drought events, etc., to understand their impact on stormwater transition over the past decades. The questions relating to the landscape level aimed to highlight factors relating to both long-standing trends and the current macro challenges that stormwater management are fac…	1. Lasting wellbeing	Overarching societal aspiration for long-term quality of life, ecological integrity, and resilience informing stormwater management objectives.
		2. Biodiversity and ecosystem conservation	Incorporating nature-based solutions (NbS) to preserve habitats, provide ecosystem services, and align stormwater management with broader ecological values.
		3. Public awareness, preference, beliefs, and trust	Collective public opinion and level of societal momentum, influencing how stormwater management strategies (e.g., decentralized) are received, endorsed, or contested in society.
		4. Cultural and behavioural shifts	Gradual changes in norms (e.g., sustainability), values, and habits (e.g., rainwater harvesting) that embed stormwater management into everyday routines and support its long-term uptake.
Regime	Questions at this level focused on understanding past and present governance and management of the stormwater systems, particularly the organizational structures, key actors, mainstream approaches, and the overarching policies and laws that govern these systems. The objective was to dissect the array of internal and external factors that contribute to the inertia or stability of these systems, as…	5. Inter-organizational interaction and coordination	Strength communication, cooperation, and coordination among various departments and organizations involved in stormwater management, reducing fragmentation and fostering a more integrated and holistic approach to stormwater management.
		6. Network and partners	Network, relationships, alliances, and partnerships among diverse stakeholders (e.g., utilities, agencies, NGOs, private sector, etc.) to support collaborative partnership.
		7. Polycentric approach	Governance structures with multiple, semi-autonomous decision-making centres operating at various levels and scales.
		8. Stormwater collaboration group	A dedicated and cross-disciplinary team (e.g., municipal water engineers, urban planners, landscape architects, strategists and finance officers) tasked with coordinating stormwater planning, implementation and evaluation across departments and external partners.
		9. Outsourcing	Engagement of external experts, consultants, or service providers to supplement internal capacities and introduce specialized knowledge.
		10. Knowledge sharing	Institutional arrangements (e.g., mentorship programs) for effective transfer of information, expertise, and lessons learned, strengthening organizational capacity.
		11. Collaborative willingness, readiness and preparedness	Organizational ethos that values openness, cooperation, and the capacity to work synergistically with external partners.
		12. Organizational governance structure	A clear internal framework delineates decision-making hierarchies, responsibilities, and procedures to ensure transparency and efficiency.
		13. Commitment and accountability	The degree to which actors (e.g., leaders, employees) uphold agreed-upon objectives and remain responsible for achieving stormwater management goals, fostering trust and reliability.
		14. Management of conflicts of interests	Procedures to identify, negotiate, and resolve competing priorities, ensuring divergent stakeholder interests do not impede stormwater management progress.
		15. Efficient decision-making process	Well-structured, evidence-based, and deliberative protocols that enhance the quality and responsiveness of stormwater management interventions.
		16. Comprehensive legislation	Robust legal frameworks and regulatory instruments formalizing standards, responsibilities, and compliance requirements for stormwater management.
		17. Policy feedback and evaluation mechanisms	Structured processes for reassessing and updating policies, ensuring continued relevance and alignment with evolving conditions.
		18. Policy interpretation and implementation	Translation of legislative and policy directives into actionable measures, integrated into daily routines and responsive to political pressures.
		19. Financing of training and skill development	Allocating dedicated funds to build human-resource capacity through education and training for effective stormwater management.
		20. Financing of operations and maintenance	Securing reliable, ongoing funds for system operation, upkeep and upgrades to sustain long-term performance.
		21. Monitoring and assessment	Continuous documentation, evaluation, and data collection on stormwater management performance, enabling evidence-based improvements.
		22. Proactive strategic planning	Proactive frameworks identifying future challenges, opportunities, and uncertainties, ensuring stormwater management resilience and preparedness.
		23. Management of uncertainties and risks	Approaches to consider, or better, to handle future variability (e.g., climate change, pandemic, and (geo) political instability), enabling flexible scenario planning and risk mitigation in stormwater management.
		24. Long-term operations and maintenance	Sustained procedures and responsibilities guiding stormwater systems lifecycle management, ensuring durability and resilience.
		25. Recreational value	Integration of stormwater management spatial contexts that offer recreational opportunities, improving public well-being.
		26. Aesthetic enhancement	Designing stormwater management interventions with visual and cultural appeal, enriching urban landscapes while fostering public appreciation and cultural relevance.
		27. Community well-being improvement	Strengthening social cohesion, local identity, and sense of belonging by aligning stormwater management with community needs, values, and everyday experiences.
		28. Stormwater quantity control	Encompasses retention, detention, harvest and other hydrologic processes that reduce or delay runoff volumes and peak flows, thereby mitigating flooding and erosion and easing pressure on downstream systems.
		29. Stormwater quality treatment	Implementing treatment and filtration measures to remove pollutants and protect receiving water bodies.
		30. Efficient use of urban public spaces	Incorporating stormwater management into municipal lands (e.g., parks) to achieve sustainability goals and offer recreational and community benefits.
		31. Effective solutions on privately owned land	Encouraging stormwater management on private properties, extending the benefits and values beyond public areas.
		32. Standardization of practice	Establishing clear guidelines, standards, and evaluation criteria to ensure consistency, traceability, and reliability in designing and implementing stormwater systems.
		33. Complex stormwater system integration	Strategically combining grey, green-blue infrastructures (or NbS) into a cohesive, multifunctional network and systems.
		34. System flexibility	The inherent ability of the stormwater systems to adjust to evolving environmental conditions, operational demands, and urban development pressures.
Niche	The questions explored the past and present technological innovations, including both decentralized measures (NbS) such as bioretention ponds, and computational technologies such as models and smart monitoring systems. Questions also related to the efficacy of various pilot projects, noting successful implementations as well as the lessons learned from trial and error in these projects. In additi…	35. Stormwater strategists - specialist & generalist	Availability of both niche experts and broadly skilled professionals supporting strategic decision making in stormwater management.
		36. Pilot policy initiatives	Small-scale, trial-based regulatory or planning experiments testing innovative approaches, informing broader reforms if successful.
		37. Financing of technical investments	Providing funding for new infrastructure, modelling tools and innovative technologies to improve stormwater management strategies and systems.
		38. Active participation and engagement	Mechanisms (e.g., community-based monitoring) for meaningful citizen involvement in decision-making and stewardship.
		39. Innovations and experimental projects	Trial-based initiatives testing novel technologies or NbS configurations, generating lessons for potential mainstream adoption.
		40. Use of advanced software, tool and material	Employing AI, IoT, advanced modelling, and eco-friendly materials to enhance stormwater management system performance and resilience.
