# Supplementary material for: Decisive Factors in Sustainable Stormwater Management
Source: Research Square preprint supplement (doi:10.21203/rs.3.rs-6965519/v1), 2025-06-29
Supplement: Supplementary file 3 [file e6ee6237090db53f50e0a6f9.xlsx]

## Sheet: Sheet1
Supplementary Note 2. | Semi-Structured Interview Guide Based on the Multi-Level Perspective (MLP). This file presents the full set of semi-structured interview questions used in Phase 1 (Fig. 1a: Step 3&4), structured according to the MLP framework from 1960 to 2024. Grey text indicates clarifying prompts or guiding narratives used when interviewees require further explanation. Bullet points ind…
Date for interview :
Name of the organization and department you work / have worked:
Job title and role:
Professional year :
Mainly area of responsibility :
REGIME QUESTIONS (1960-2024)
STORMWATER MANAGEMENT SYSTEMS	During your career and to your knowledge - which system and techniques in stormwater management have been most prevalent?
	· Are these techniques still widely used today?
	· If so, why do they remain dominant? (e.g., effectiveness? ease of use? resistance to change?)
GOVERNANCE & MANAGEMENT	Who within your organization has been primarily responsible for stormwater management?
	We're interested in understanding how collaboration around stormwater management is approached in your organization. (Collaboration is often a key factor in effectively managing stormwater within urban environments, involving various departments, organizations, and stakeholders.)
	•How does cross-departmental collaboration work look like?
	· Who are the key partners ?
POLICY OR LEGISLATION	Have any specific policies or pieces of legislation significantly impacted the development of stormwater management?
	·If yes, which one/ones, and why were they important?
MAIN ACTORS	Who would you say has been especially influential in shaping the direction of stormwater management in the city while you've been here?
	· Does this influence primarily come from political, departmental, or external private actors?
	· Has this influence looked the same over the years?
OTHER ACTORS	Have there been occasions when you outsourced stormwater management?
	If external private actors have influenced stormwater management decisions, who are they?
	· private organizations?
	· company ?
	· the public ?
	· private people ?
IMPACT AND INFLUENCES FROM SOCIETY	Do you believe the general society / public is concerned with how stormwater is managed? Why or why not?
FINANCIAL RESOURCES	How would you describe the financial conditions within your organization for achieving goals in stormwater management? (e.g., Budget allocation and prioritization; Funding Sources; Financial challenges; Future financial planning. )
	· Can you talk about the budget and funding available for stormwater management projects here?
	· Do you feel it's been adequate for meeting your goals?
LANDSCAPE QUESTIONS (1960-2024)
MACRO IMPACT AND INFLUENCES	How have broader strategic considerations/agendas been integrated into your organization's approach to stormwater management? (e.g., climate change, sustainability, resilience, and biodiversity etc.)
	· If yes, in what way ? (e.g., Influence the decision-making process in stormwater management? Mindset? operational agenda? Etc. )
GRADUAL CHANGE / IMPACT - SOCIAL	How are social values such as recreation, amenity, integrated into stormwater management?
	(Consideration of place identity/sense of place, activities, and aesthetics, etc., name more? )
GRADUAL CHANGE / IMPACT - OTHER	In addition to climate change, stormwater management is affected by a variety of other trends and agendas. How do you feel about that?
	(Urban densification? environmental justice? public health? )
IMMEDIATE CHANGE / IMPACT	Have you experienced natural and unpredictable events such as flooding, cloudburst, system fail that led to a (immediate) change in stormwater practice and polices ?
	· If yes, what event and which year?
	· If so, how did this affect the organization and how you worked?
	· If yes, change in policies and guidelines?
	· Has there been an opportunity for financial support in the event of sudden events?
NICHE QUESTIONS (1960-2024)
TECHNOLOGY & INNOVATION	How have technological innovations (e.g., monitoring, sensors, simulations, decision-support tools, AI) impacted stormwater management?
	· How to you think of AI used in your work?
OPEN STORMWATER MANAGEMENT (NATURE BASED SOLUTIONS)	When did your organization begin to adopt or see an increase in the use of open or natural based solutions for managing stormwater?
	· If yes, Which year? Which place? What prompted this shift?
PILOTS & EXPERIMENTATION	Could you highlight any key projects that have significantly influenced the evolution of stormwater management practices? Either successful or unsuccessful ones. (Impactful outcomes, Lesson learnt, Strategy or policy shift, Collaboration and partnership, etc.?)
	How important would you say experimentation and testbeds are to the development of stormwater management?
	· Why? When? Where in the cityscape?
	· Has the development come from practice (via "trial and error ") or has the development been driven by research?
	· What examples can be given in that case and when?
FINANCIAL RESOURCES FOR PILOTS & EXPERIMENTATION	Can you discuss the availability of funding and resources dedicated to exploring new and innovative approaches in stormwater management?
	How has this impacted the ability to pilot experimental projects?
COOPERATION & KNOWLEDGE TRANSFER	How do knowledge and experience sharing in stormwater management work within your department, with other departments, or with external entities?
	· Do you feel that there are/were good opportunities for knowledge and experience transfer between different city departments
	· Has the administration had time to keep up with developments?
	· Which collaboration works well? Why?
	· Is/was there a specific system or approach within the department and organization for knowledge transfer between employees?
	· If yes, which ones?
	· If yes, when were these/this introduced?
	· If yes, have they been formalized in any way (in strategies, internal policies , etc.)? Has internal knowledge ever been formalized?
INDIVIDUAL COMPETENCE	To what extent do you feel that a single individual's competence and drive have been significant for the development within stormwater management?
	(Can you share how the expertise, leadership, and enthusiasm of any individual within our organization have significantly influenced our approach to stormwater management? We're interested in specific examples where such contributions have led to meaningful changes, innovations, or breakthroughs in our practices.)
	· If yes, leadership and vision?
	· Positive influence on others / team members / partners?
	· Or Influence on Policies and Practices?
